# Supplementary material for: Microglia drive APOE-dependent neurodegeneration in a tauopathy mouse model
Source: PubMed Central journal article supplement — J Exp Med. 2019 Oct 10;216(11):2546–61. doi: 10.1084/jem.20190980 (PMC6829593; doi:10.1084/jem.20190980), 2019-10-10
Supplement: JEM_20190980_sm.pdf [file JEM_20190980_sm.pdf]

Supplemental material

Shi et al., <https://doi.org/10.1084/jem.20190980>

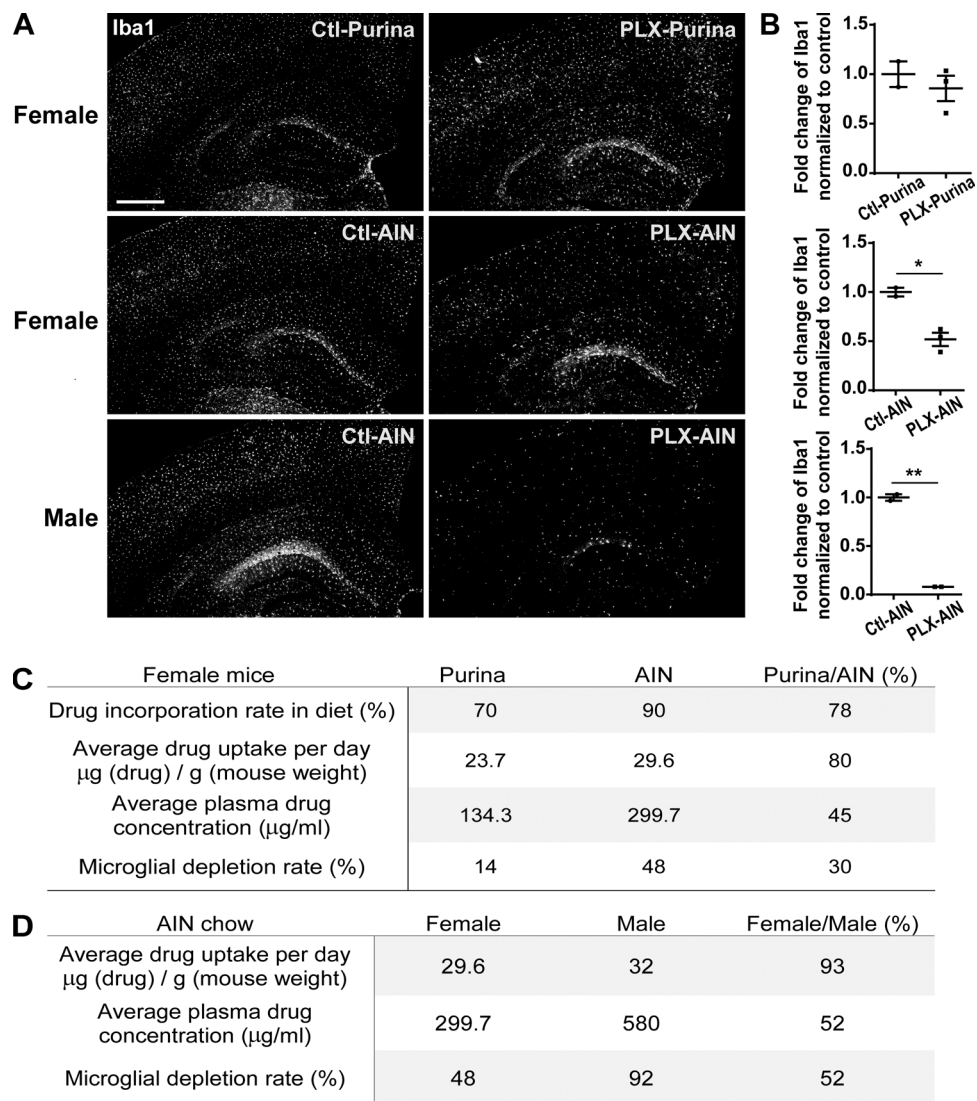

Figure S1. **Mouse sex and chow formula impact the efficiency of microglial depletion by PLX3397.** (A) Iba1 staining images for 3–4-mo-old female or male TE4 mice treated with 300 mg/kg PLX3397 supplemented in either Purina-5053 or AIN-76A diet for 7 d ( $n = 2-3$  mice per group). Scale bar = 500  $\mu\text{m}$  for all images. (B) Quantification of Iba1-covered area in the hippocampus. (C and D) Effects of chow formula and sex on serum PLX3397 levels in relation to microglial depletion rate. Data are expressed as means  $\pm$  SEM. One-way ANOVA with Tukey's post hoc test. \*,  $P < 0.05$ ; \*\*,  $P < 0.01$ . The experiments in A and B were repeated three times.

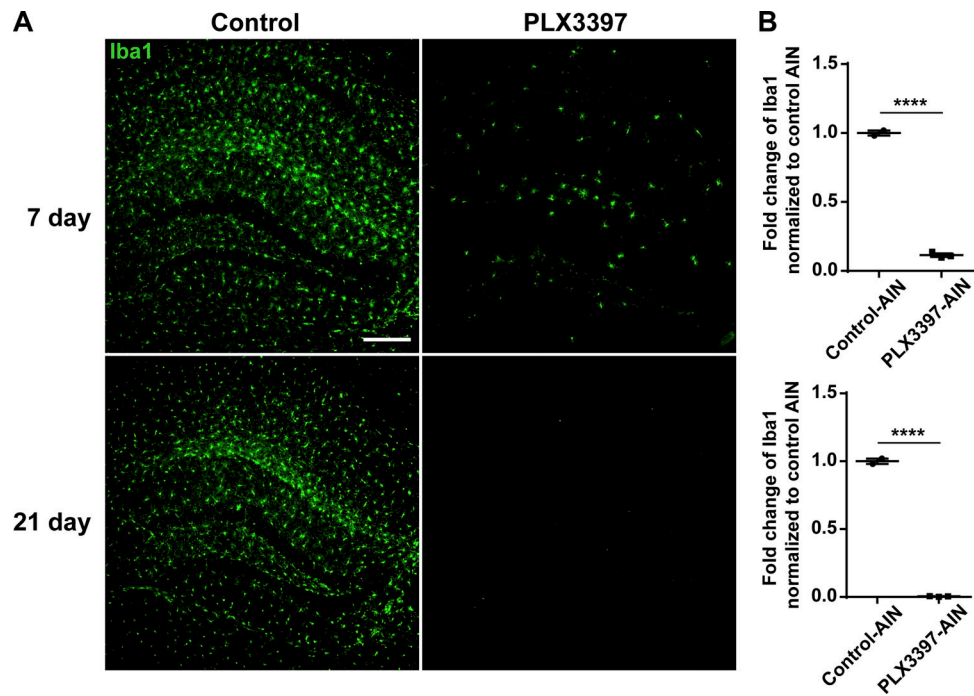

Figure S2. **PLX3397 supplemented in the AIN-76A diet at 400 mg/kg chow depletes microglia with high efficiency.** (A) Iba1 staining images for 5–6-month old male E4 mice treated with 400 mg/kg PLX3397 supplemented in the AIN-76A diet for 7 or 21 d ( $n = 2-3$  mice per group). Scale bar = 200  $\mu\text{m}$  for all images. (B) Quantification of Iba1-covered area in the hippocampus. Data are expressed as means  $\pm$  SEM. One-way ANOVA with Tukey's post hoc test. \*\*\*\*,  $P < 0.0001$ . This characterization experiment was performed once.

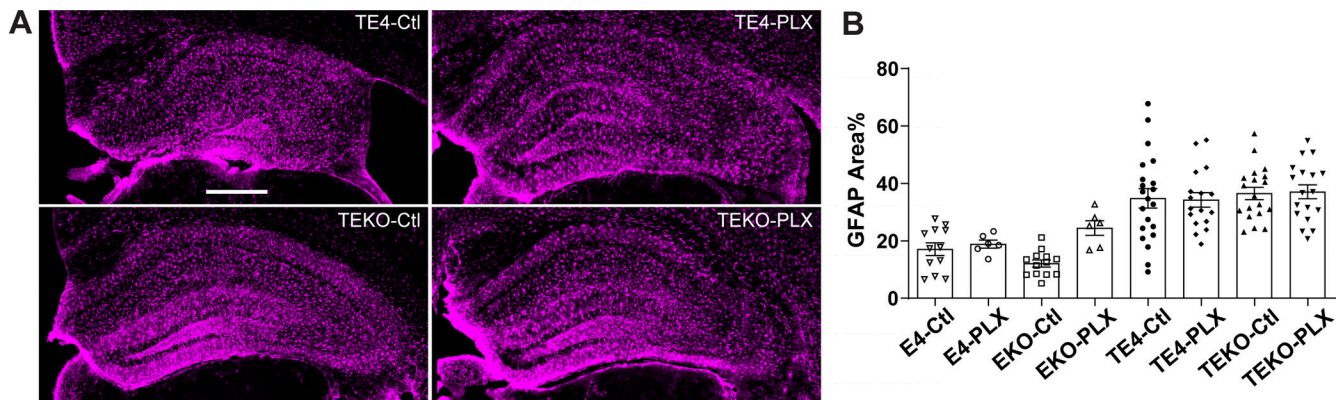

Figure S3. **PLX3397 treatment does not affect GFAP<sup>+</sup> astrocytes.** (A) Representative images of GFAP staining for 9.5-month old TE4 and TEKO mice treated with control (Ctl) or PLX3397-supplemented (PLX) chow. Scale bar = 500  $\mu\text{m}$  for all images. (B) Quantification of GFAP-covered area in the hippocampus of all mice (TE4-Ctl:  $n = 21$ ; TE4-PLX:  $n = 17$ ; TEKO-Ctl:  $n = 19$ ; TEKO-PLX:  $n = 18$ ; E4-Ctl:  $n = 12$ ; E4-PLX:  $n = 6$ ; EKO-Ctl:  $n = 13$ ; EKO-PLX:  $n = 6$ ). Data are expressed as means  $\pm$  SEM. One-way ANOVA with Tukey's post hoc test. The GFAP staining was performed once.

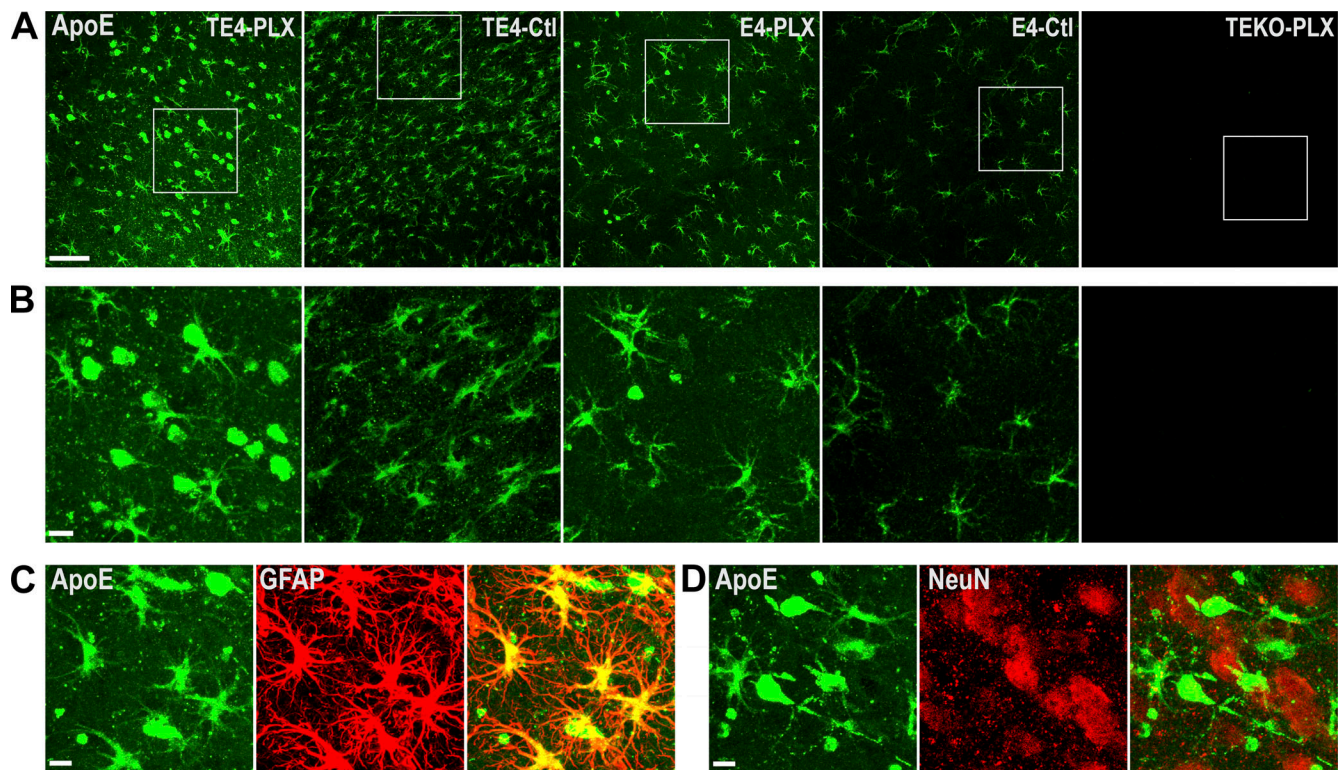

Figure S4. **ApoE is elevated in astrocytes and neurons in the piriform/entorhinal cortex of PLX3397-treated TE4 and E4 mice.** (A) Representative images of apoE staining in the piriform/entorhinal cortex of 9.5-mo-old TE4-PLX, TE4-Ctl, E4-PLX, E4-Ctl, and TEKO-PLX mice, respectively. Scale bar = 50  $\mu$ m for all images. (B) Zoom-in of the selected area in A. Scale bar = 10  $\mu$ m for all images. (C) Co-localization of apoE with GFAP<sup>+</sup> astrocytes in the piriform/entorhinal cortex of TE4-PLX mouse. Scale bar = 10  $\mu$ m. (D) Non-co-localization between apoE and NeuN in the piriform/entorhinal cortex of TE4-PLX mouse. Scale bar = 10  $\mu$ m. ApoE staining was repeated seven times using different antibodies.



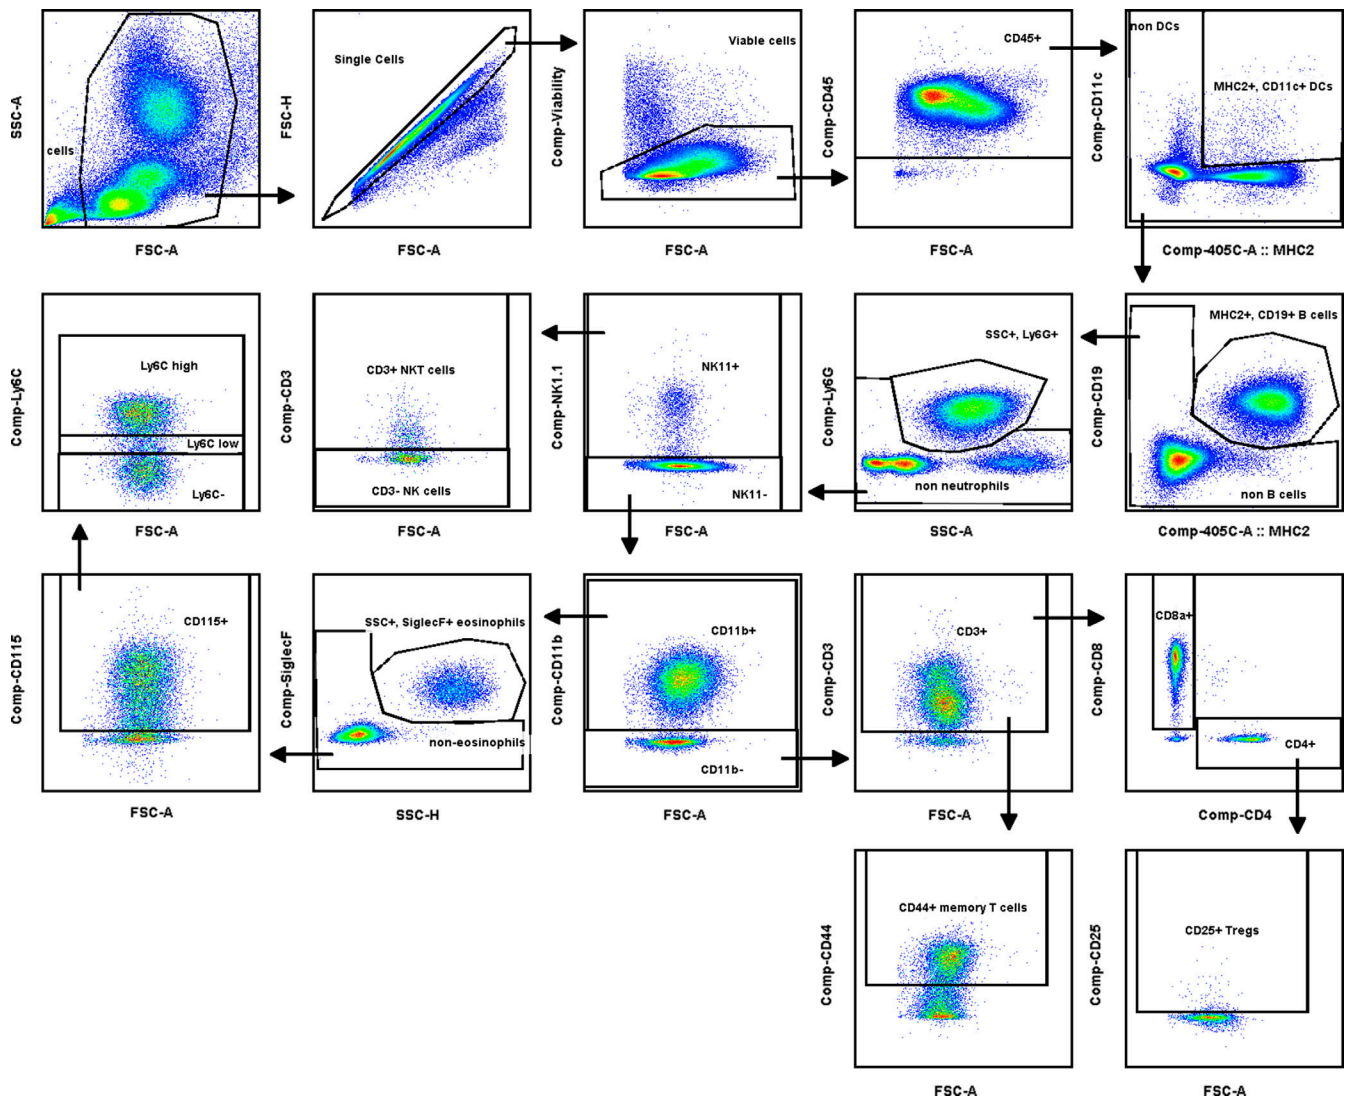

Figure S5. **Gating strategies for isolating blood cell types using flow cytometry.** Blood cells were sequentially gated through total cells, single cells, viable cells, and CD45<sup>+</sup> cells. From the CD45<sup>+</sup> gate, DCs were isolated as the MHC2<sup>+</sup>CD11c<sup>+</sup> population. From the non-DC gate, B cells were isolated as the MHC2<sup>+</sup>CD19<sup>+</sup> population. From the non-B cell gate, neutrophils were isolated as the SSC<sup>high</sup>Ly6G<sup>+</sup> population. From the nonneutrophil gate, NK1.1<sup>+</sup> cells were isolated and further divided into CD3<sup>+</sup> NK T cells and CD3<sup>-</sup> NK cells. The NK1.1<sup>-</sup> gate was further separated into CD11b<sup>+</sup> and CD11b<sup>-</sup> gates. From the CD11b<sup>+</sup> gate, eosinophils were isolated as the SSC<sup>high</sup>SiglecF<sup>+</sup> population. From the noneosinophil gate, monocytes were isolated as the CD115<sup>+</sup> population, which was further divided into Ly6C<sup>hi</sup>, Ly6C<sup>lo</sup>, and Ly6C<sup>-</sup> populations. From the CD11b<sup>-</sup> gate, T cells were isolated as the CD3<sup>+</sup> population, which was further separated into CD4<sup>+</sup> and CD8<sup>+</sup> T cells, or CD44<sup>+</sup> memory T cells. From the CD4<sup>+</sup> T cell gate, T reg cells were isolated as the CD25<sup>+</sup> population. SSC-A, side scatter area; FSC-A, forward scatter area; SSC-H, side scatter height.
